# Supplementary material for: ZMYND8 mediated liquid condensates spatiotemporally decommission the latent super-enhancers during macrophage polarization
Source: PubMed Central journal article supplement (PMC8586003; doi:10.1038/s41467-021-26864-x), 2021-11-11
Supplement: 41467_2021_26864_MOESM3_ESM.pdf [file 41467_2021_26864_MOESM3_ESM.pdf]

### **Description of additional Supplementary data files**

File name : Supplementary Data 1

Description: The source of plasmids, as well as all the cloning primers and RT-PCR primers, are listed here.
